# Supplementary material for: Behavioral color vision in a cichlid fish: Metriaclima benetos
Source: Oxford University Press journal article supplement (doi:10.1242/jeb.160473), 2017-01-01
Supplement: jeb160473supp.pdf [file jeb160473supp.pdf]

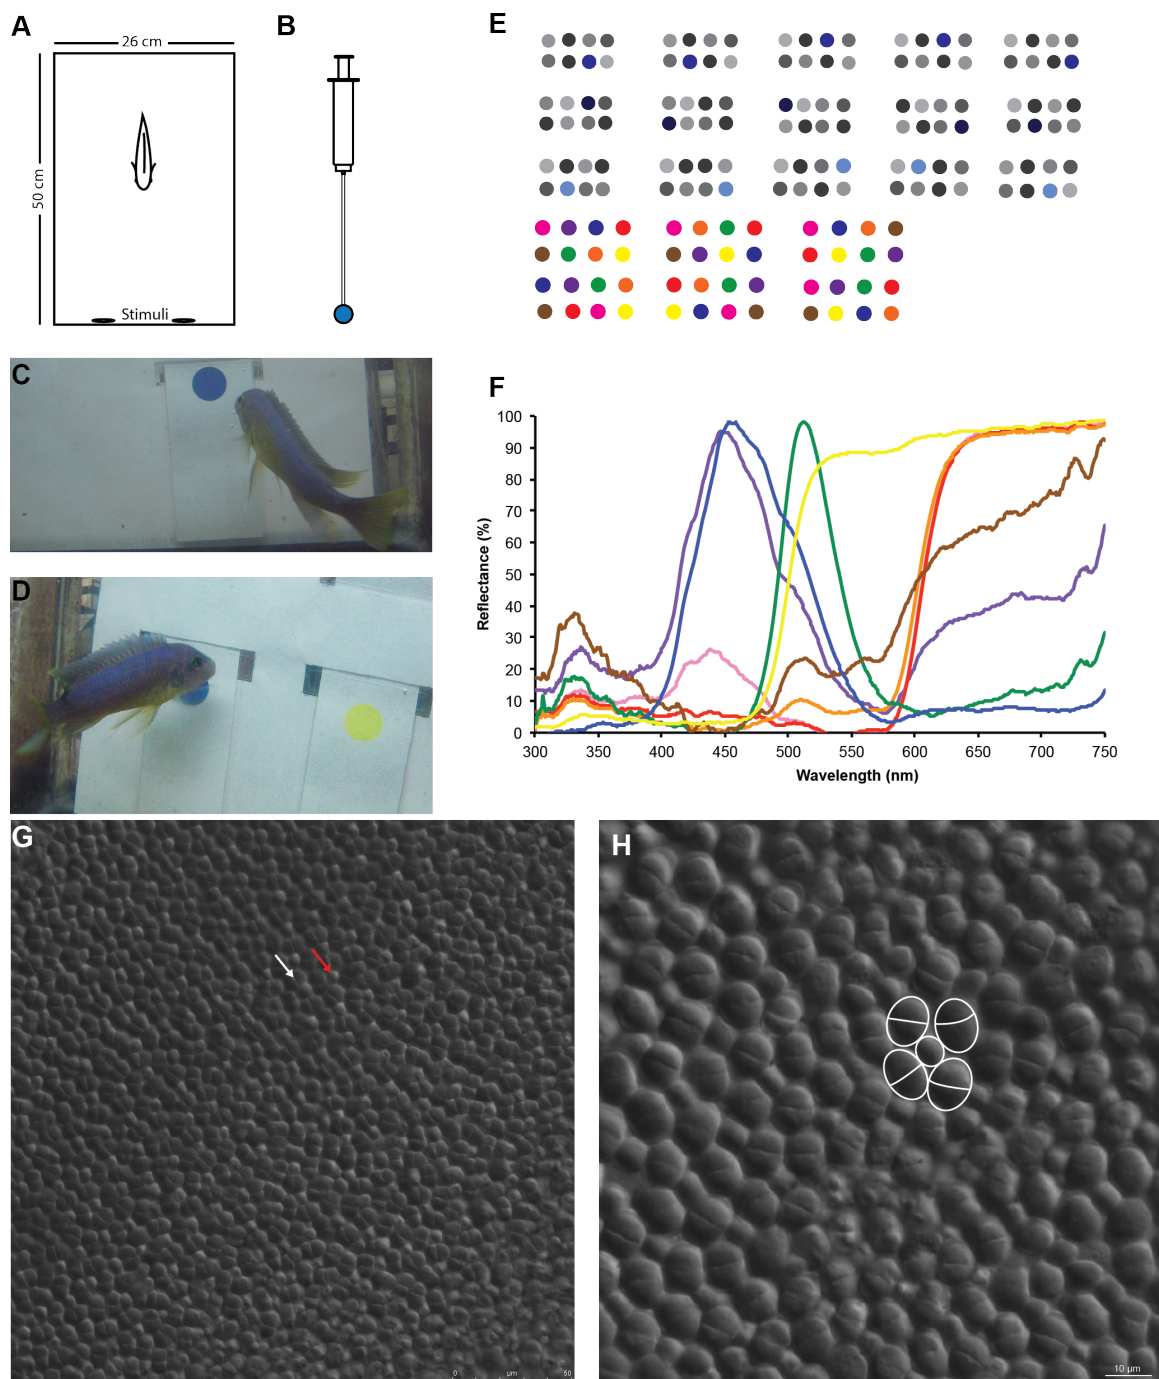

**Fig. S1.** (A) house hold tanks (B) Feeding apparatus for training (C) Photograph of fish during training (D) Photograph of fish during testing.(E) Multiple-choice cards used in Experiments 2 and 3. (F) Normalized reflectance of colors in Experiment 3. (G) Differential interference contrast (DIC) images of cone mosaic arrangements in *M. benetos*. A white arrow points out double cones while the red arrow a single cone. (H) a close-up of the square mosaic of cones is highlighted in white showing a single cone surrounded by four double cones.

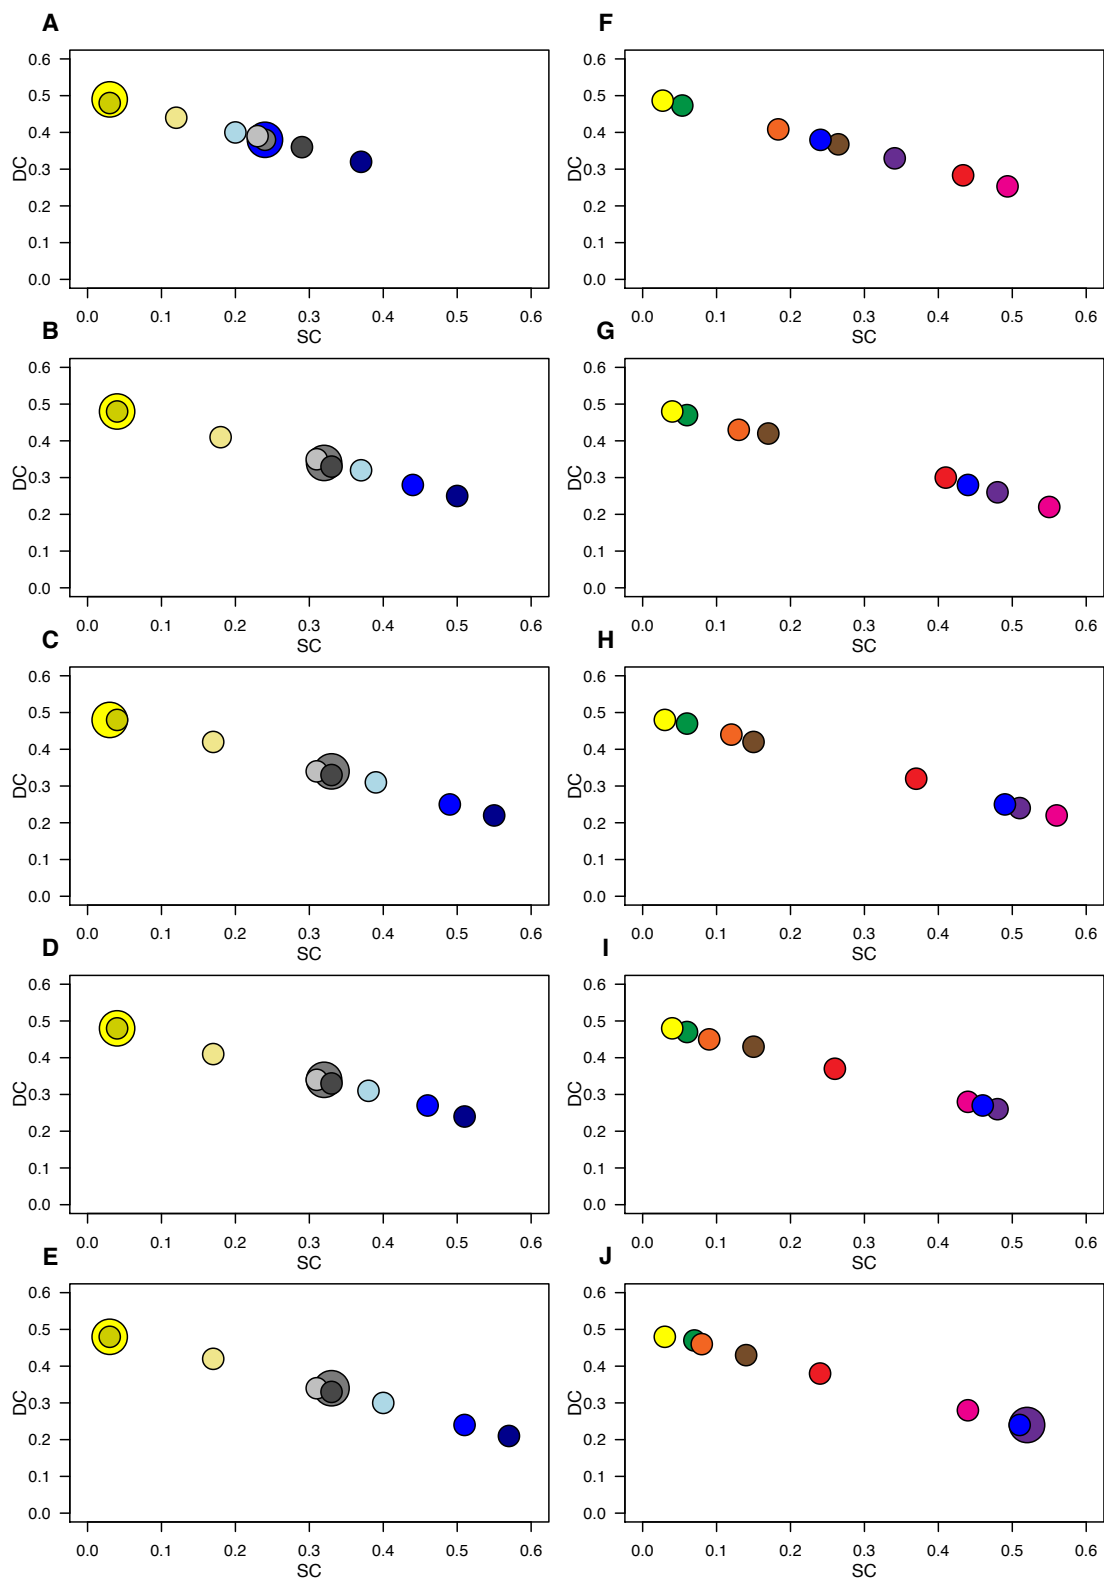

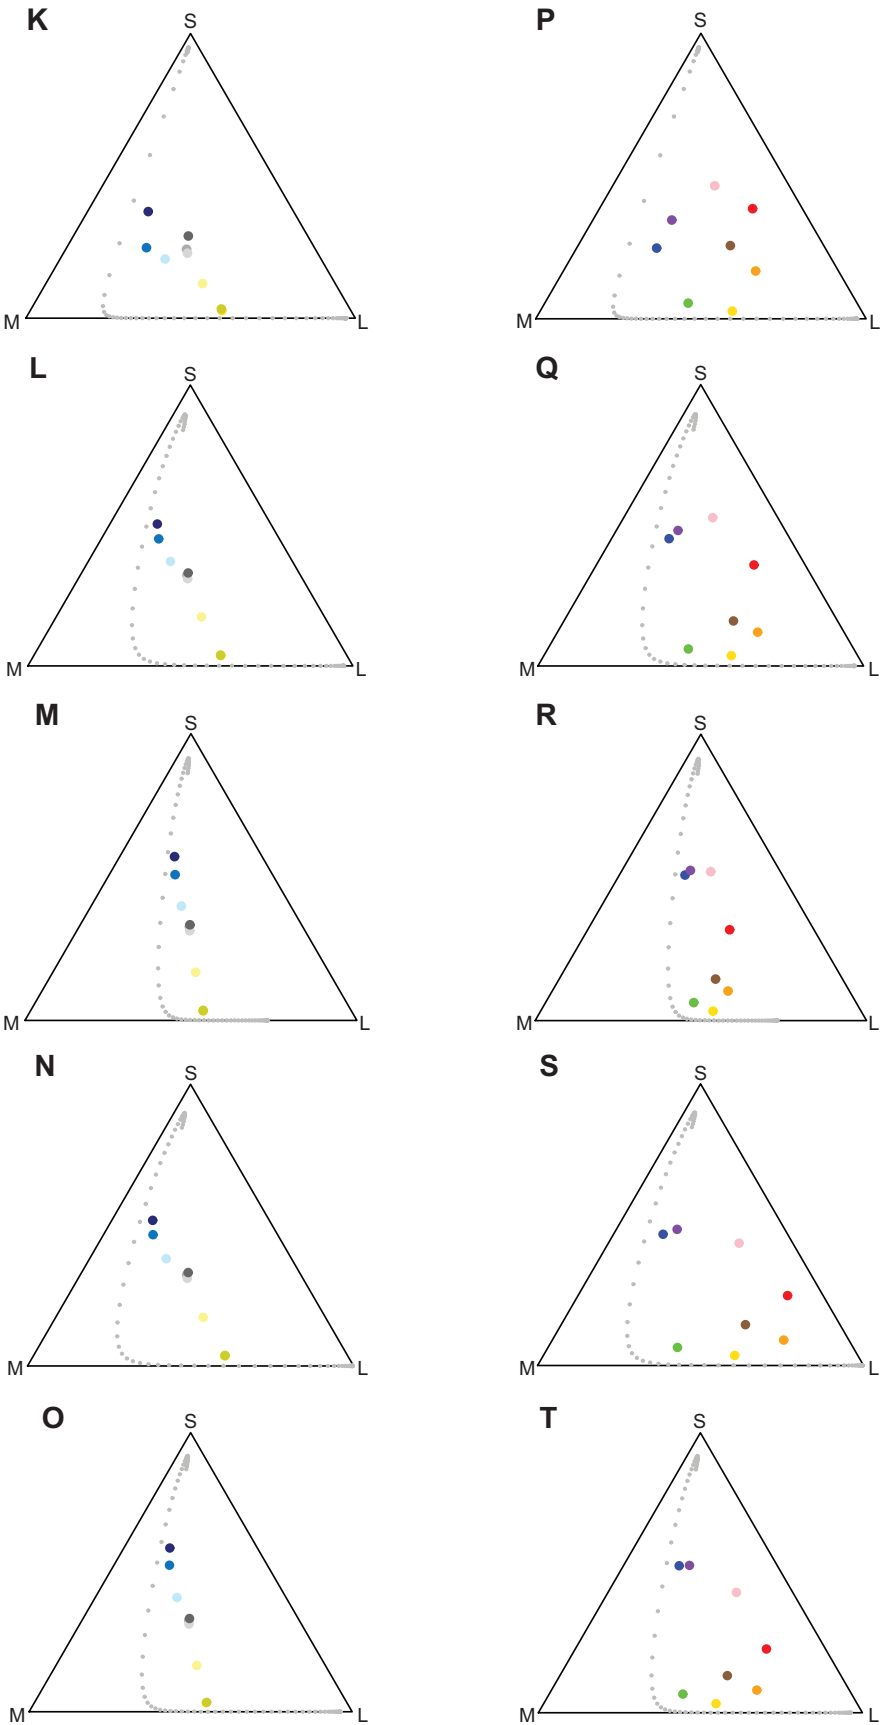

**Fig. S2. Quantum catches in dichromatic and trichromatic visual systems.** (A-J) show normalized quantum catch of colors in Experiments 1, 2 and 3. In a dichromatic visual system, photoreceptor's stimulations are plotted as signals in single cones (SC, x axis) and as summed signals in double cones (DC, y axis). Quantum catches were normalized using Eqn 1 & 2 for S-, M- and LWS cones. Combined signal-stimulation (summed) of double cones (DC) was calculated with Eqn 4. (A and F) represent quantum catch when there is pure opsin expression (SWS1, RH2B, RH2A $\alpha$ ) whereas (B-E and G-J) represents opsin coexpression combinations 1-4 respectively (SWS1/SWS2B, RH2A $\beta$ /RH2B, LWS/RH2A $\alpha$ , Table S2A). Bigger dots are used to reveal overlapping data-points in the SC-DC space. For a trichromatic visual system, photoreceptor stimulations are plotted in chromaticity diagrams with target colors plotted in the color space of *M. benetos* for experiments 1, 2 and 3 in a trichromatic visual system (K-T). Target colors are represented as a colored circle in the receptor space where each axis corresponds to the quantum catches of short/UV (S), medium (M) and long (L) sensitive photoreceptors. Monochromatic loci at 5 nm intervals are represented by gray dots. (K and P) represent quantum catch when there is pure opsin expression whereas (K-O and P-T) correspond to the four opsin coexpression combinations respectively.

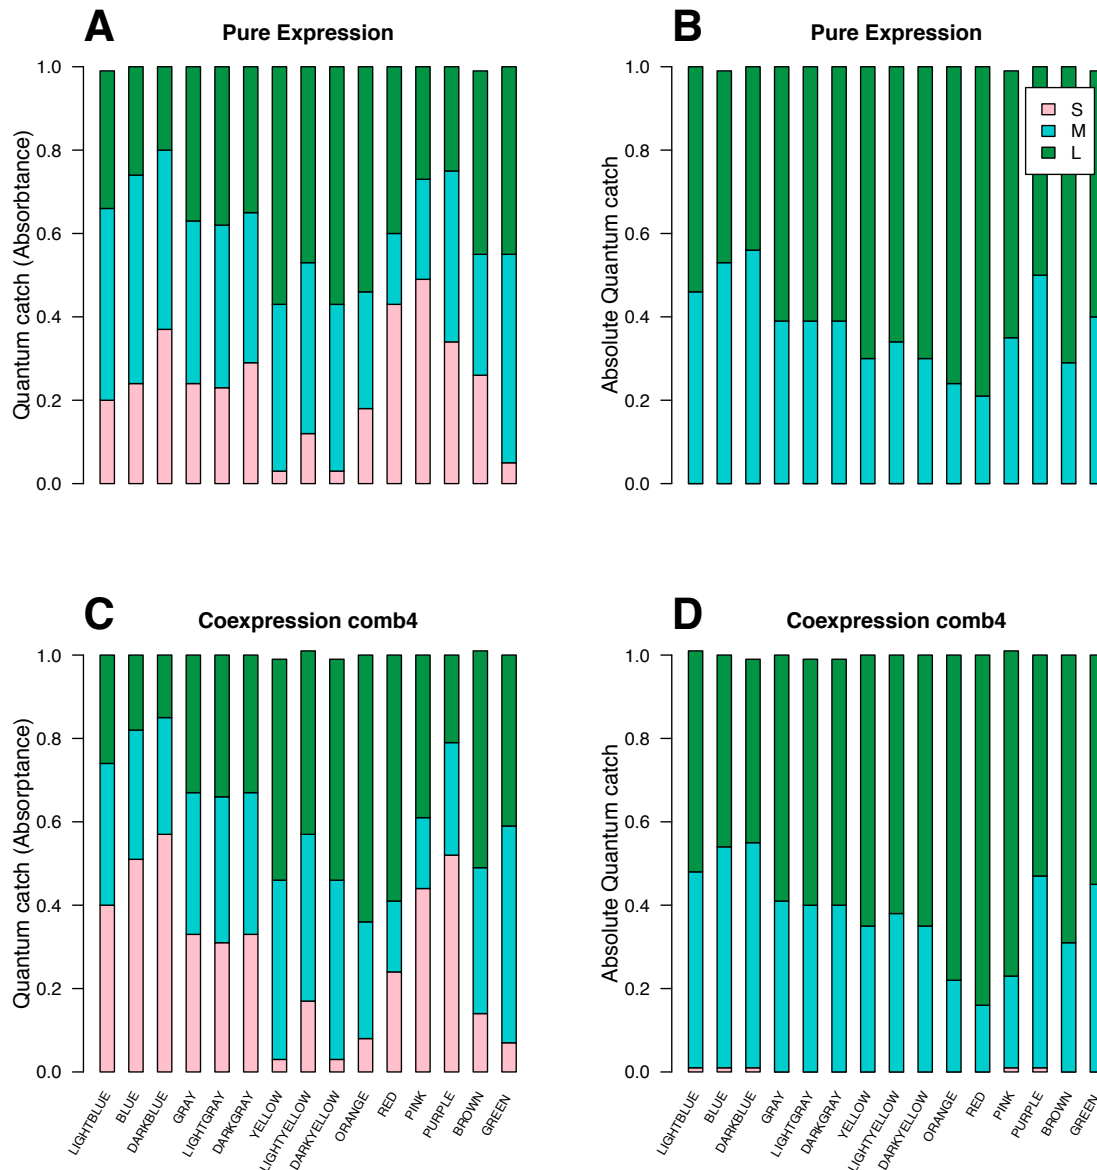

**Fig. S3. Normalized quantum catch and absolute quantum catch for all colors in Experiments 1, 2 and 3.** A & B represent visual systems based on pure opsin expression whereas C & D are based on opsin coexpression combination 4. A & C are quantum catches estimated with spectral absorbance whereas B & D are quantum catches estimated by absolute spectral sensitivity (Table S2B). Stacked color bars show the stimulation for each type of photoreceptor (S, M and L) for each color. Note that when photon shot noise is considered, quantum catch from the S photoreceptor is severely reduced in both scenarios.

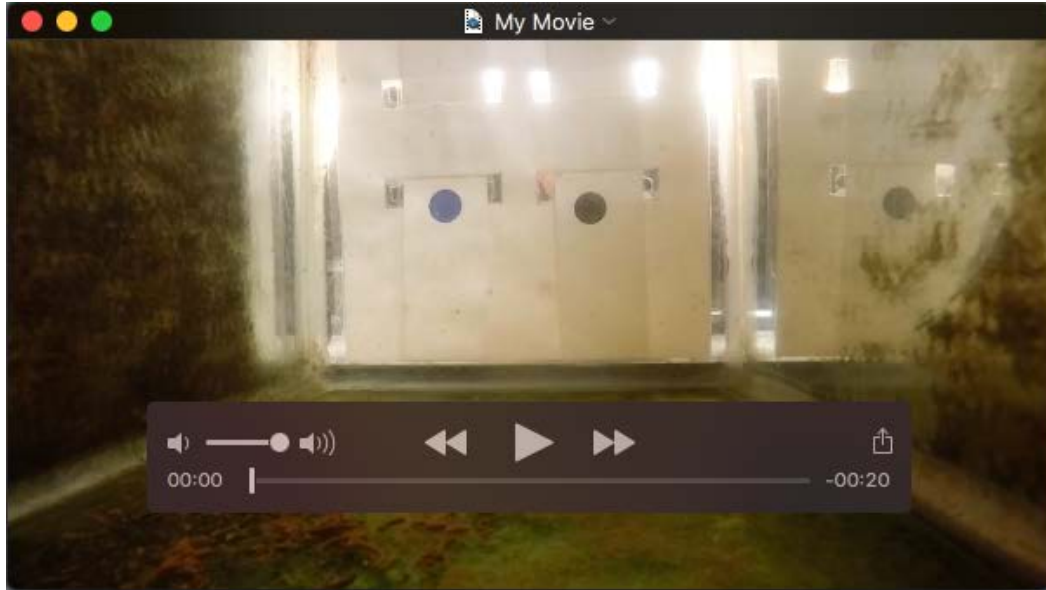

**Movie 1.** Experiment 1, 2 & 3 test. Two alternative choice test, blue vs darkgray, multiple choice test, blue vs shades of gray, multiple choice test, blue vs different colors.

**Table S1.** a. Visual pigments and coexpression combinations, b. Lens transmission, c. Side dwelling irradiance in the fishroom, d. Color cards reflectances

[Click here to Download Table S1](#)

**Table S2.** A. Statistical results for behavioral tests, B. Quantum stimulation of colors for short, medium and long-wavelength sensitive cones (S-, M-, LWS)., C. Chromatic distance,  $\Delta S$  (JNDs) for trichromat, D. Chromatic distance,  $\Delta S$  (JNDs) for dichromat

[Click here to Download Table S2](#)
